# Supplementary material for: Volatile social environments can favour investments in quality over quantity of social relationships
Source: bioRxiv or medRxiv preprint supplement (doi:10.1101/2021.10.01.462760), 2022-02-11

# Supplementary Figures

**Figure S1:** Examples of emerging social networks depending on the socializing behaviours of individuals (propensities to interact with strangers) and on the volatility of the social environment. See caption of Figure 3 for more details. Under a volatile social environment, individual lifespan is short, and the number of partnerships remains very low because individuals do not have time to build many relationships. Here,  $N=50$ .

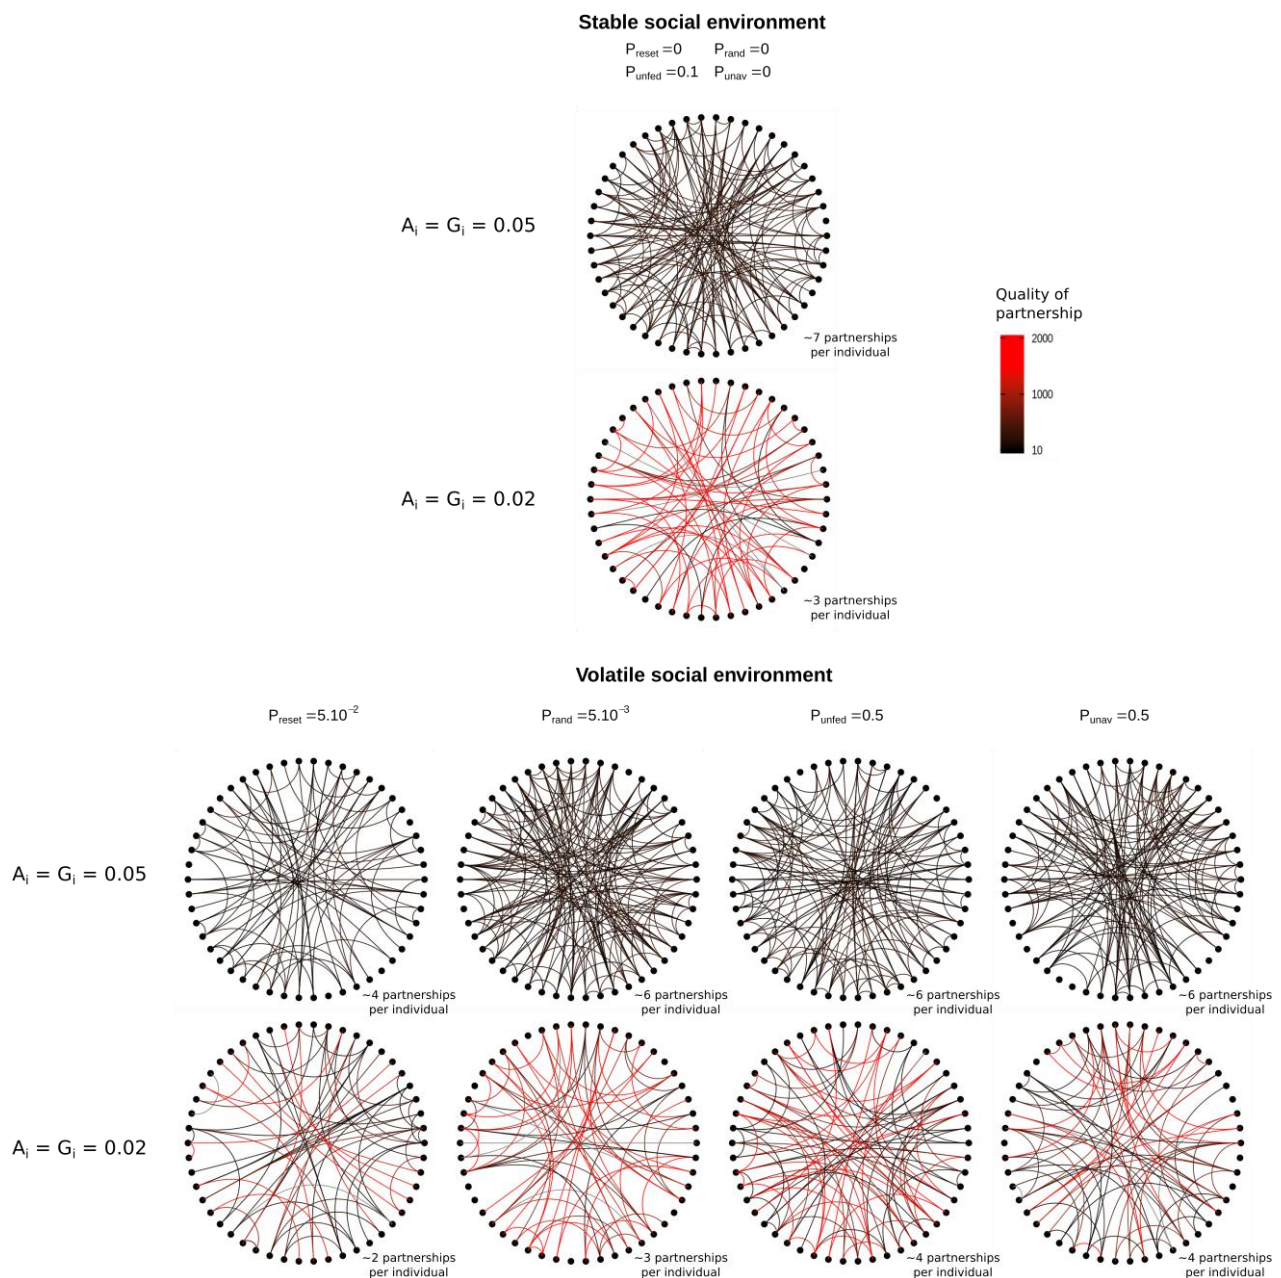

**Figure S2:** Trait values,  $A_i$  and  $G_i$ , at evolutionary equilibrium reached after 5 million time steps, for different group sizes. In a large group, individuals have to focus investment on few individuals to build partnerships, leading to low trait values  $A_i$  and  $G_i$ , because the risk of diluting cooperative investments is too high. For high values of  $P_{\text{erase}}$ ,  $P_{\text{die}}$ ,  $P_{\text{unsucc}}$  and  $P_{\text{unav}}$ , the evolutionary equilibrium is characterized by cooperative strategies focusing on the quality of each partnership rather than on the quantity of partnerships (low  $A_i$  and low  $G_i$ ) as in the main analysis.

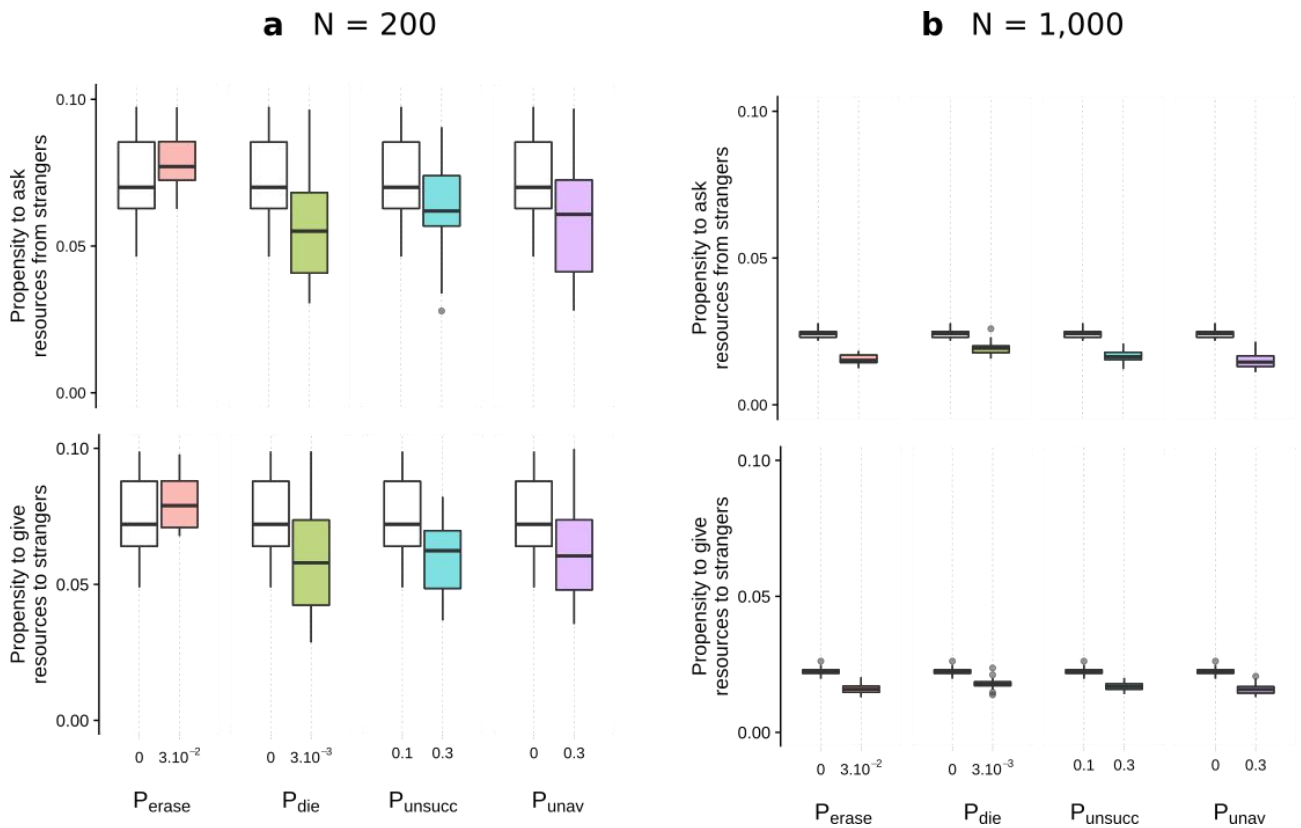

**Figure S3:** Trait values,  $A_i$  and  $G_i$ , at evolutionary equilibrium reached after 5 million time steps, for different strengths of the prior. For high  $F$ , updating away from prior belief is more difficult, and individuals have to focus investment on few individuals to build partnerships, leading to low trait values  $A_i$  and  $G_i$ . For high values of  $P_{\text{erase}}$ ,  $P_{\text{die}}$ ,  $P_{\text{unsucc}}$  and  $P_{\text{unav}}$ , the evolutionary equilibrium is characterized by cooperative strategies focusing on the quality of each partnership rather than on the quantity of partnerships (low  $A_i$  and low  $G_i$ ) as in the main analysis.

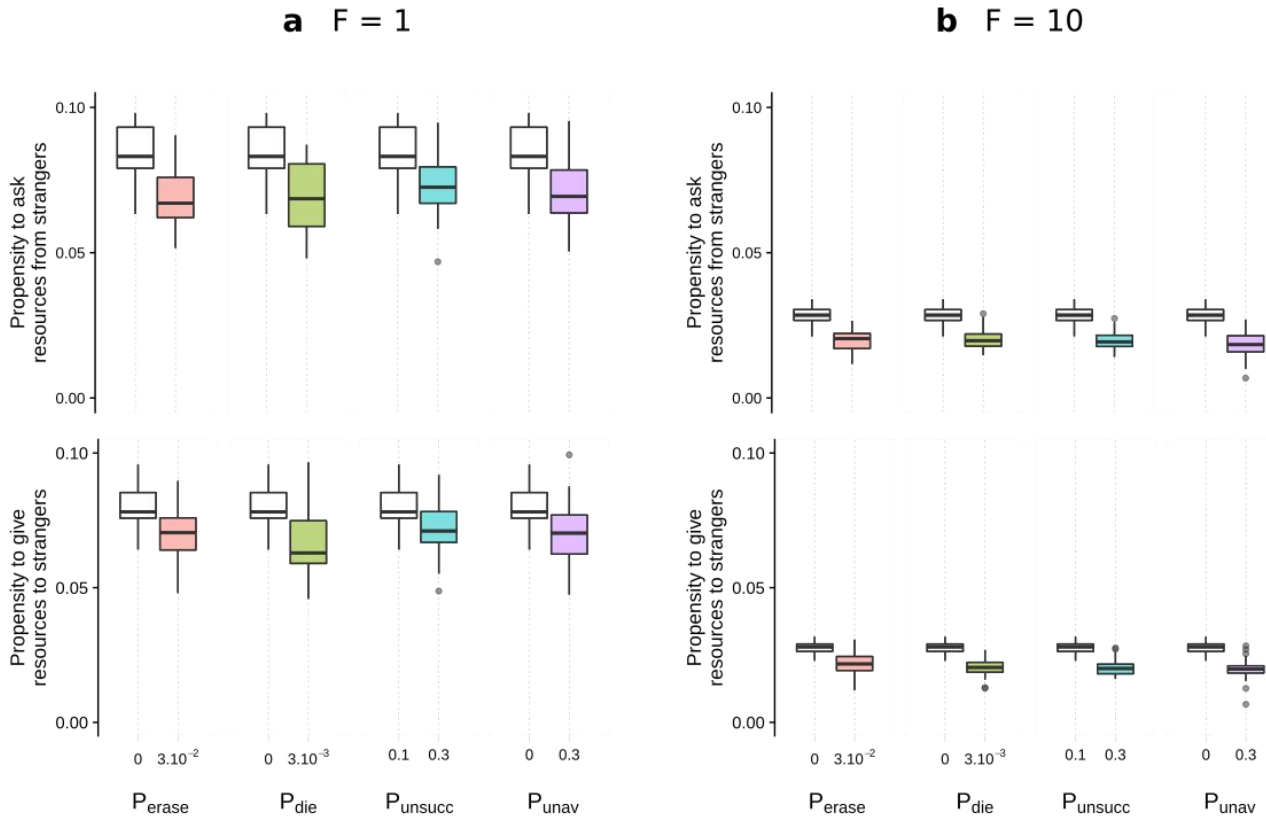

**Figure S4:** Trait values,  $A_i$  and  $G_i$ , at evolutionary equilibrium reached after 5 million time steps, for different number of possible interactions per time step. For low values of  $n_{ask}$  and  $n_{give}$ , individuals have less interaction opportunities, and individuals have to focus cooperative investments on few individuals to build partnerships, leading to low trait values  $A_i$  and  $G_i$ . For high values of  $P_{erase}$ ,  $P_{die}$ ,  $P_{unsucc}$  and  $P_{unav}$ , the evolutionary equilibrium is characterized by cooperative strategies focusing on the quality of each partnership rather than on the quantity of partnerships (low  $A_i$  and low  $G_i$ ) as in the main analysis.

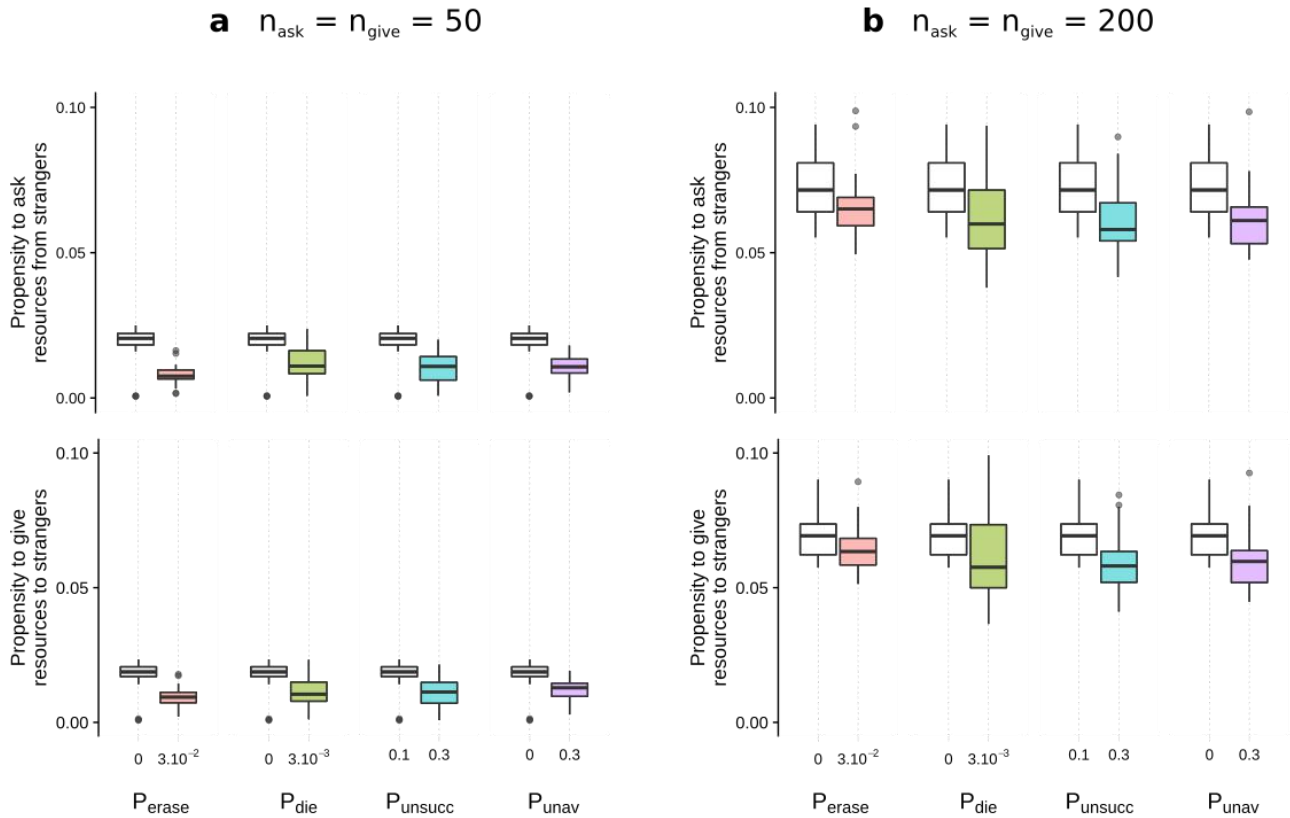

**Figure S5:** Trait values,  $A_i$  and  $G_i$ , at evolutionary equilibrium reached after 5 million time steps, for different resource-dependent mortality functions shown in Fig. 2. For high resource-dependent mortality, individuals have to focus investment on few individuals to build partnerships, leading to low trait values  $A_i$  and  $G_i$ . For high values of  $P_{\text{erase}}$ ,  $P_{\text{die}}$ ,  $P_{\text{unsucc}}$  and  $P_{\text{unav}}$ , the evolutionary equilibrium is characterized by cooperative strategies focusing on the quality of each partnership rather than on the quantity of partnerships (low  $A_i$  and low  $G_i$ ) as in the main analysis.

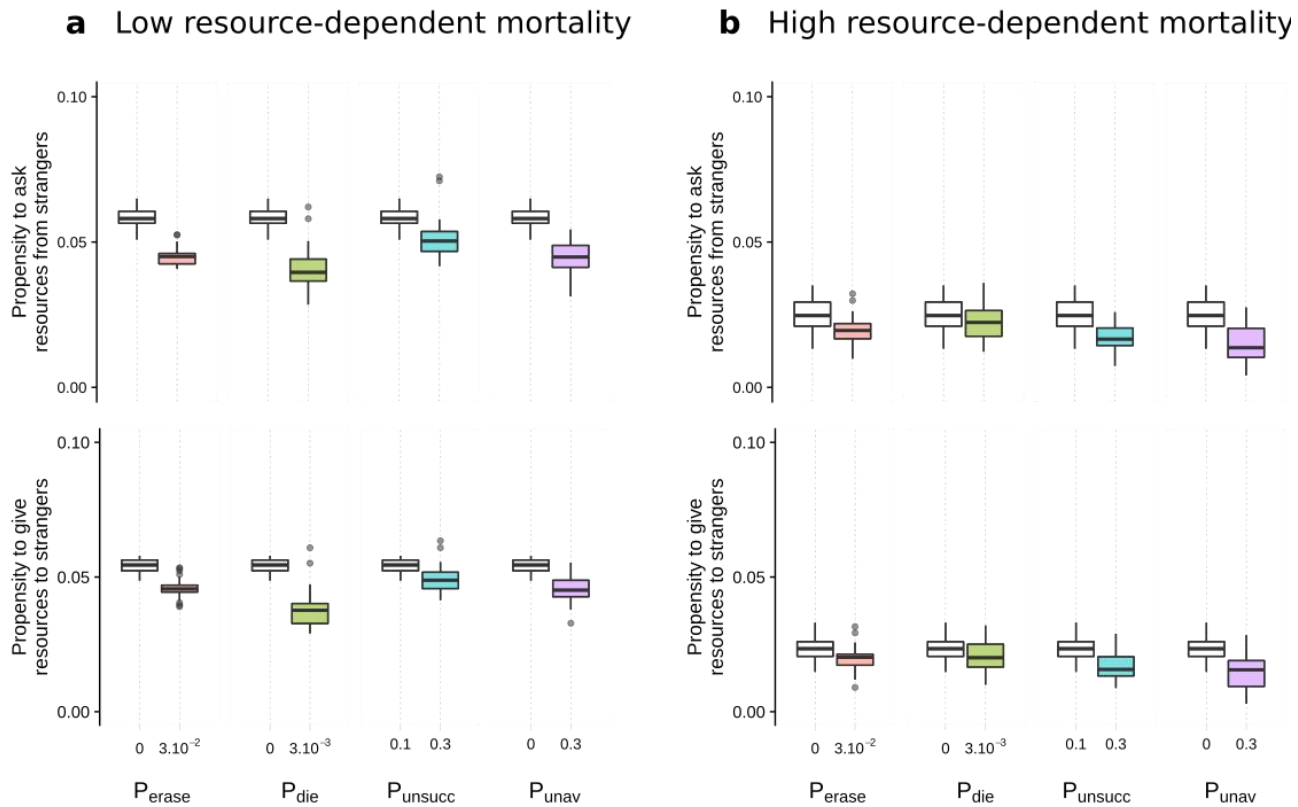

**Figure S6:** Probability of survival of unsuccessful individuals depending on the amount of resources received with a different resource-dependent mortality function (a), and trait values,  $A_i$  and  $G_i$ , at evolutionary equilibrium reached after 5 million time steps (b). Here, we implement the survivorship function as:  $P_{starv}(r) = (1 - \gamma_s)(1 - \exp(-(1-r)/R_s))$ , with  $\gamma_s=0.9$  and  $R_s=0.4$ . For high values of  $P_{erase}$ ,  $P_{die}$ ,  $P_{unsucc}$  and  $P_{unav}$ , the evolutionary equilibrium is characterized by cooperative strategies focusing on the quality of each partnership rather than on the quantity of partnerships (low  $A_i$  and low  $G_i$ ) as in the main analysis.

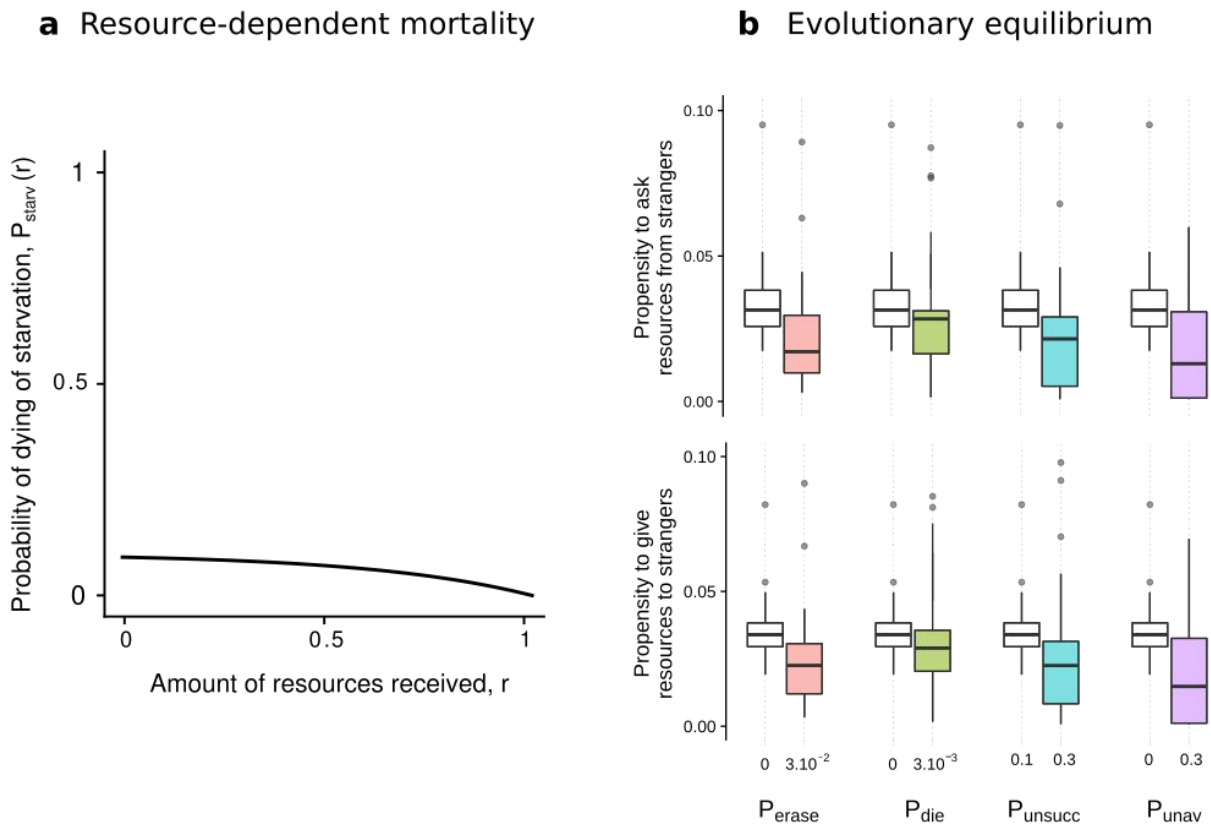

**Figure S7:** Comparison between different age measures. In the analysis, we measure age based on time steps at unsuccessful state. Here, we show that this age measure reflects age based on all time steps, such that 'Age based on time steps at unsuccessful state'  $\approx P_{\text{unsucc}} \times$  'Age based on all time steps'.

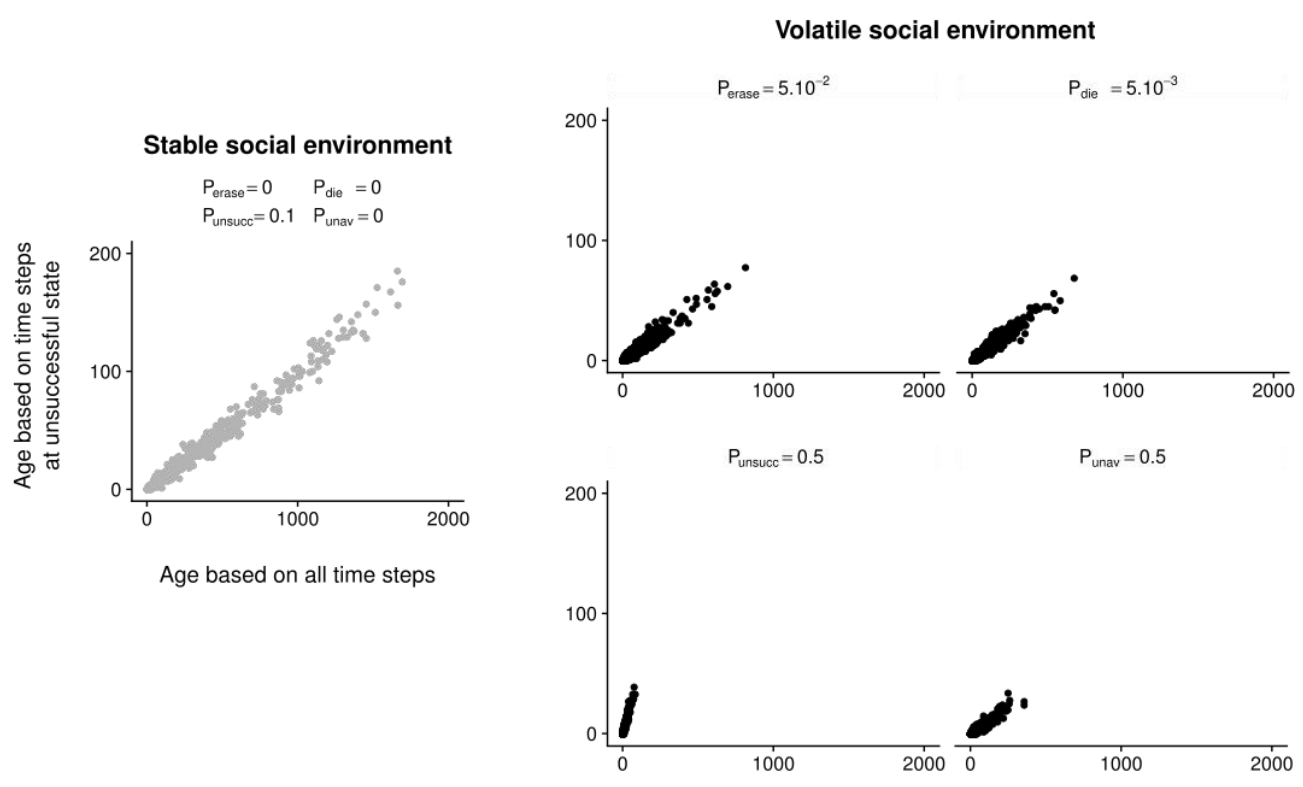

**Figure S8:** Characteristics of social relationships and survivorship of one individual  $i$  depending on its age and on its trait value in a population where  $A_j = G_j = 0.035$  for all other individuals  $j$  either under a stable social environment or under a volatile social environment ( $P_{\text{erase}} = 5 \cdot 10^{-2}$ ). See caption of Figure 5 for more details. We get qualitatively the same results as in the case with a high probability  $P_{\text{die}}$  of random death (Fig. 5) with the exception that individuals with low  $A_i$  and  $G_i$  traits end up with a low number of relationships even late in life when  $P_{\text{erase}} = 5 \cdot 10^{-2}$  (for  $A_i=0.02$  vs. for  $A_i=0.05$ ). In a volatile society, speeding up the socializing process at an early age is crucial, even if this leads to a smaller network that is deleterious later in life (as in Fig. 5).

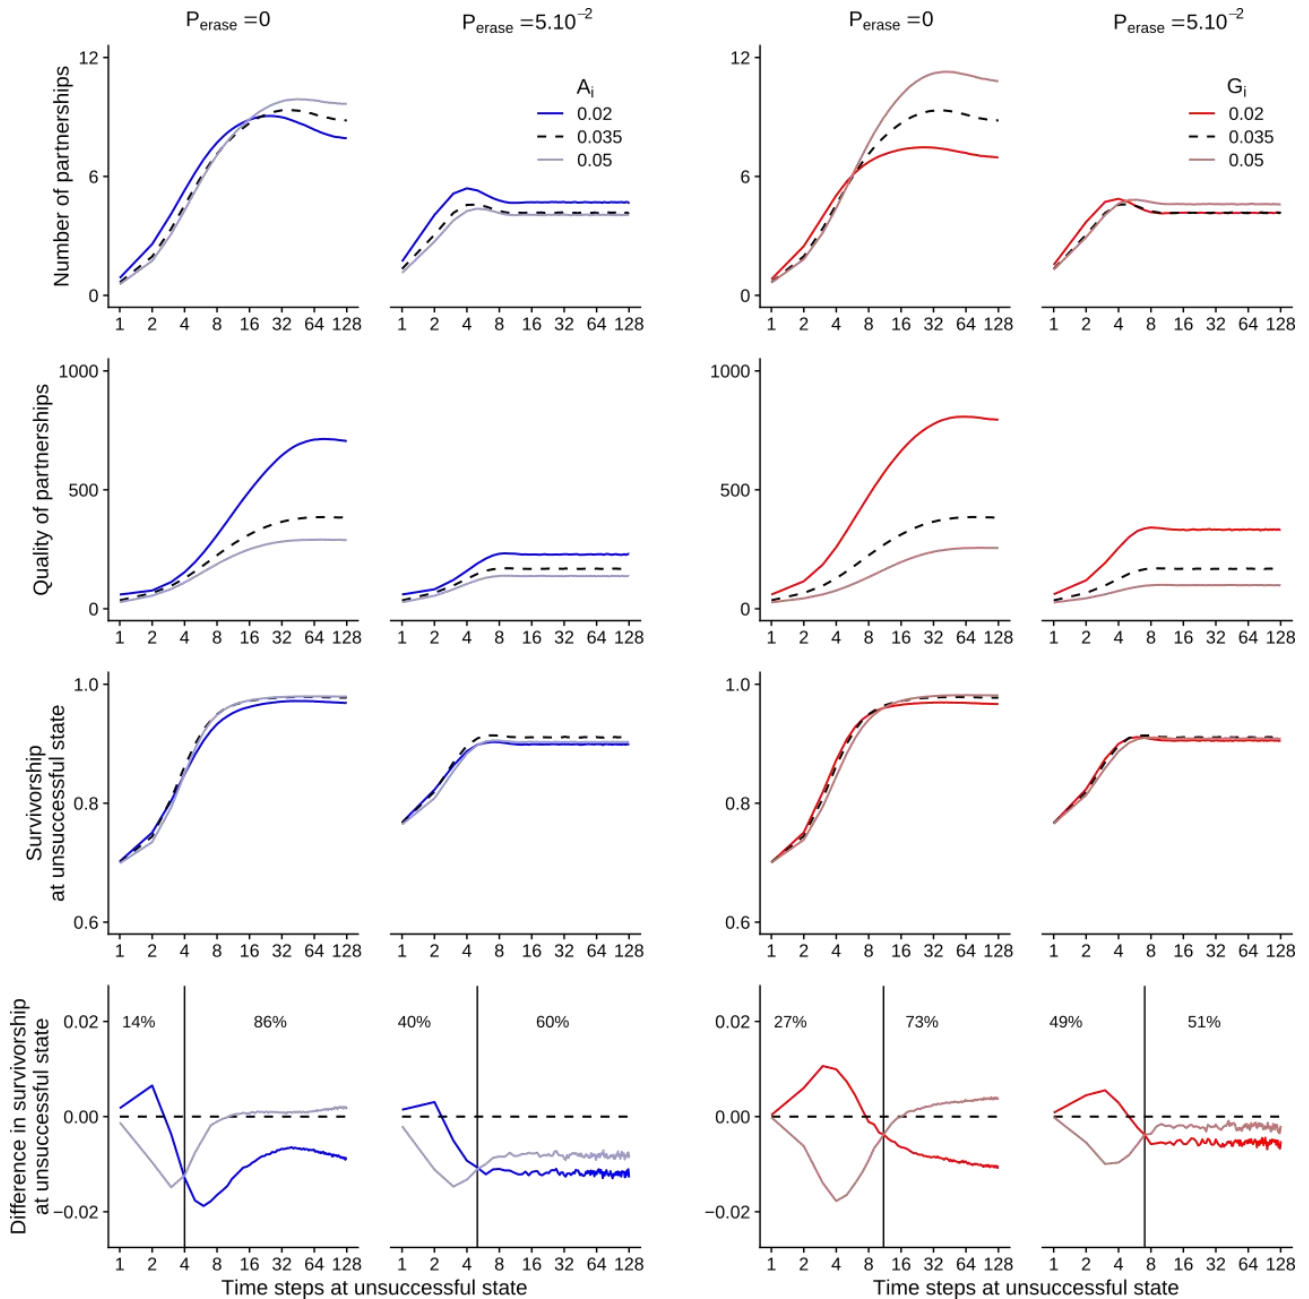



**Figure S9:** Characteristics of social relationships and survivorship of one individual  $i$  depending on its age and on its trait value in a population where  $A_j = G_j = 0.035$  for all other individuals  $j$  either under a stable social environment or under a volatile social environment ( $P_{\text{unsucc}} = 0.5$ ). See caption of Figure 5 for more details. We get qualitatively the same results as in the case with a high probability  $P_{\text{die}}$  of random death (Fig. 5). Early performance matters more than late performance (as in Fig. 5).

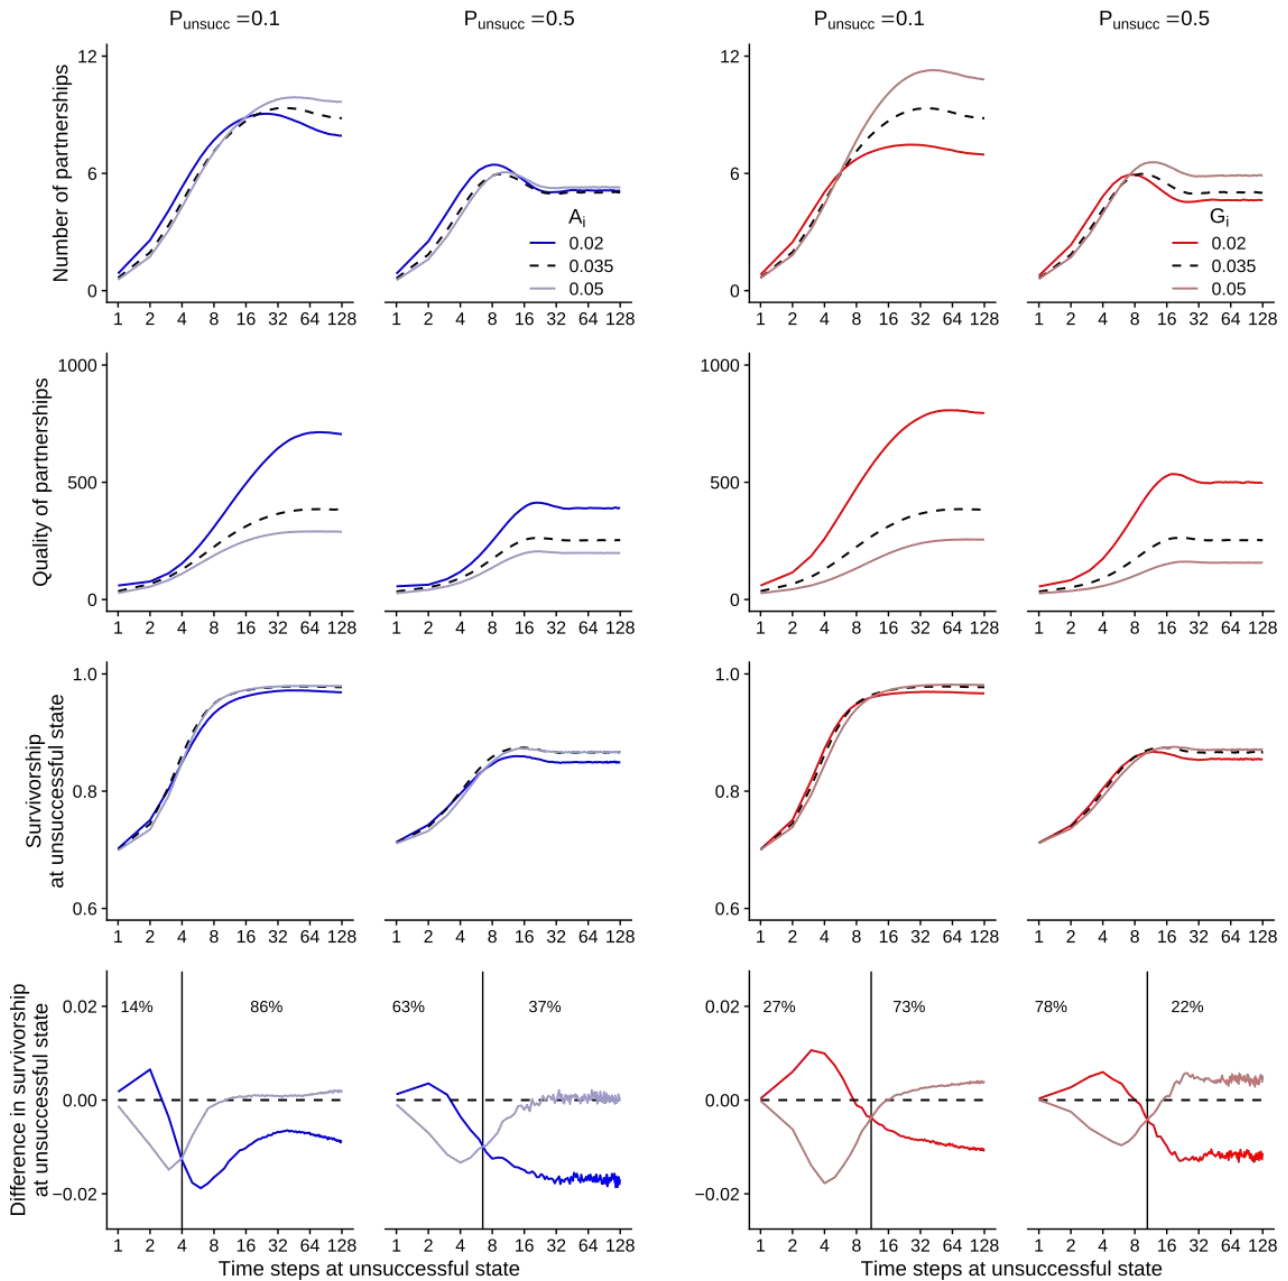

**Figure S10:** Characteristics of social relationships and survivorship of one individual  $i$  depending on its age and on its trait value in a population where  $A_j = G_j = 0.035$  for all other individuals  $j$  either under a stable social environment or under a volatile social environment ( $P_{unav} = 0.5$ ). See caption of Figure 5 for more details. We get qualitatively the same results as in the case with a high probability  $P_{die}$  of random death (Fig. 5). Early performance matters more than late performance (as in Fig. 5).

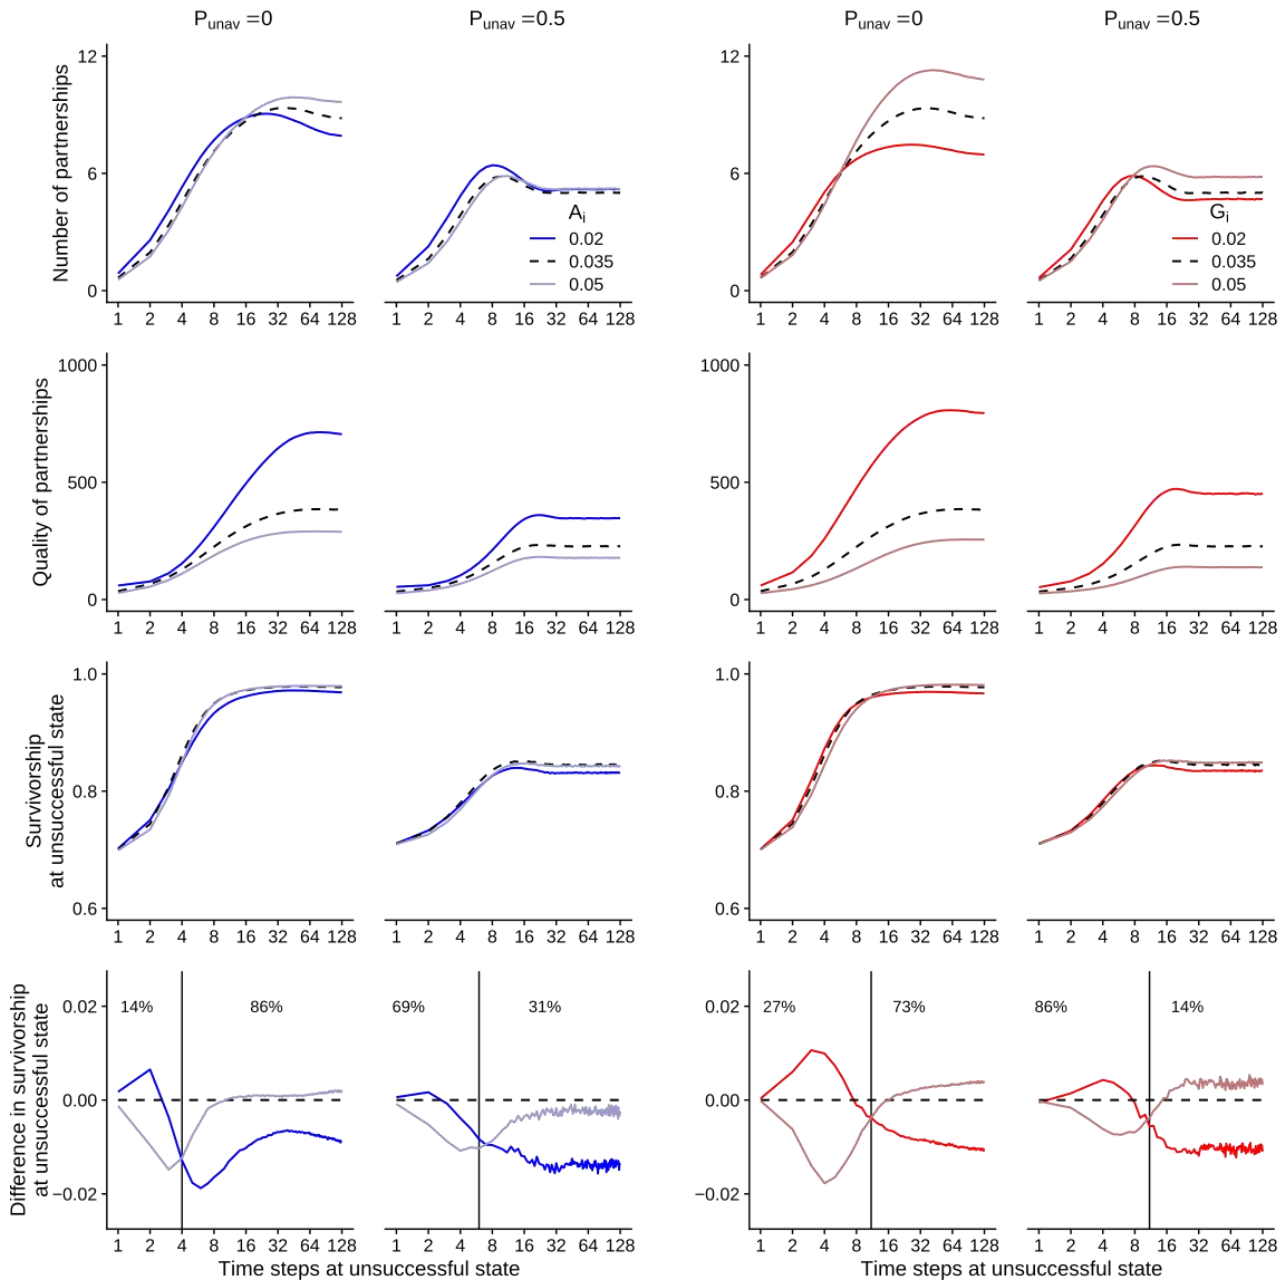

**Figure S11:** Age distribution under different social environments. A volatile social environment associates with high mortality, and therefore changes the age distribution.

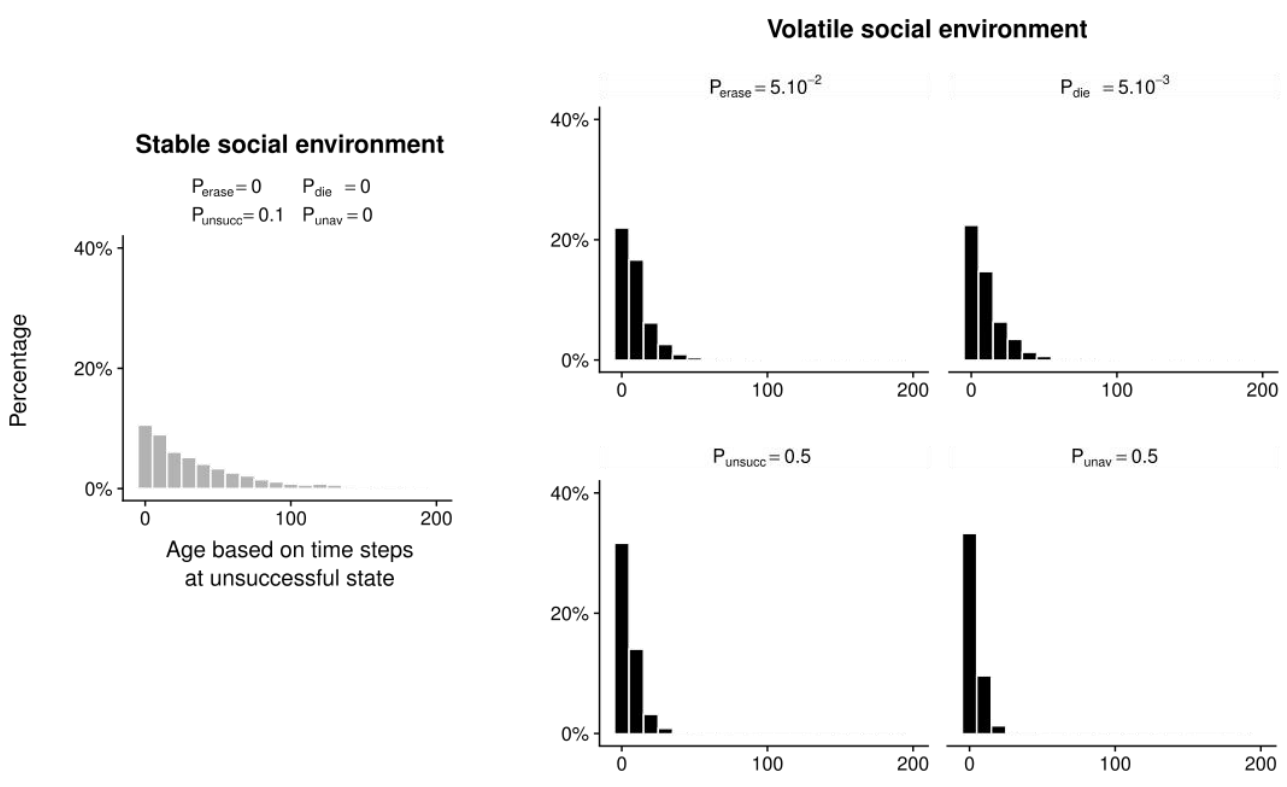

Supplement: Supplementary file [file media-1.pdf]
